# Supplementary material for: Measurement Report: Rapid decline of aerosol absorption coefficient and aerosol optical properties effects on radiative forcing in urban areas of Beijing from 2018 to 2021
Source: Copernicus journal article supplement (doi:10.5194/acp-2022-751), 2023-01-04
Supplement: Supplementary file 1 [file acp-2022-751-supplement.pdf]

## **Supplement of**

# **Measurement Report: Rapid decline of aerosol absorption coefficient and aerosol optical properties effects on radiative forcing in urban areas of Beijing from 2018 to 2021**

Xinyao Hu<sup>1,2</sup>, Junying Sun<sup>1,3\*</sup>, Can Xia<sup>1,4</sup>, Xiaojing Shen<sup>1</sup>, Yangmei Zhang<sup>1</sup>, Quan Liu<sup>1</sup>, Zhaodong Liu<sup>1,4</sup>, Sinan Zhang<sup>1</sup>, Jialing Wang<sup>1</sup>, Aoyuan Yu<sup>1,2</sup>, Jiayuan Lu<sup>1</sup>, Shuo Liu<sup>1</sup>, and Xiaoye Zhang<sup>1</sup>

<sup>1</sup>State Key Laboratory of Severe Weather & Key Laboratory of Atmospheric Chemistry of CMA, Chinese Academy of Meteorological Sciences, Beijing 100081, China

<sup>2</sup>University of Chinese Academy of Sciences, Beijing 100049, China

<sup>3</sup>State Key Laboratory of Cryospheric Science, Northwest Institute of Eco-Environment and Resources, Chinese Academy of Sciences, Lanzhou 730000, China

<sup>4</sup>Nanjing University of Information Science & Technology, Nanjing 210044, China

*\*Correspondence to:* Junying Sun ([jysun@cma.gov.cn](mailto:jysun@cma.gov.cn))

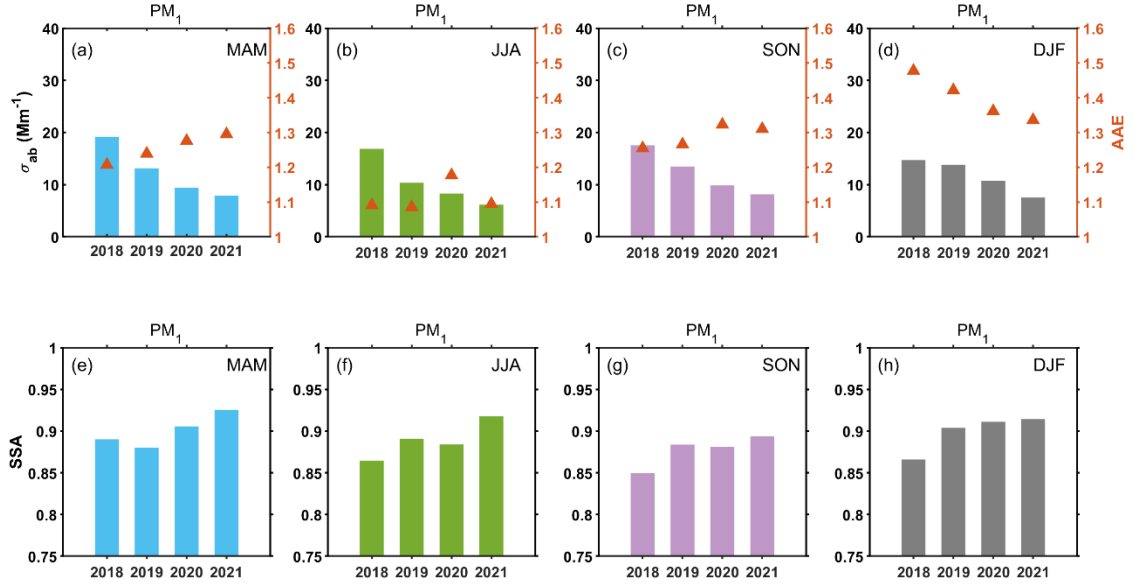

**Figure S1.** (a-d) Seasonal mean  $\sigma_{ab}$  (bar) for PM<sub>1</sub> at 550 nm, seasonal mean AAE<sub>450/700</sub> (triangle) for PM<sub>1</sub>, and (e-f) seasonal mean SSA (bar) for PM<sub>1</sub> at 550 nm from 2018-2021.

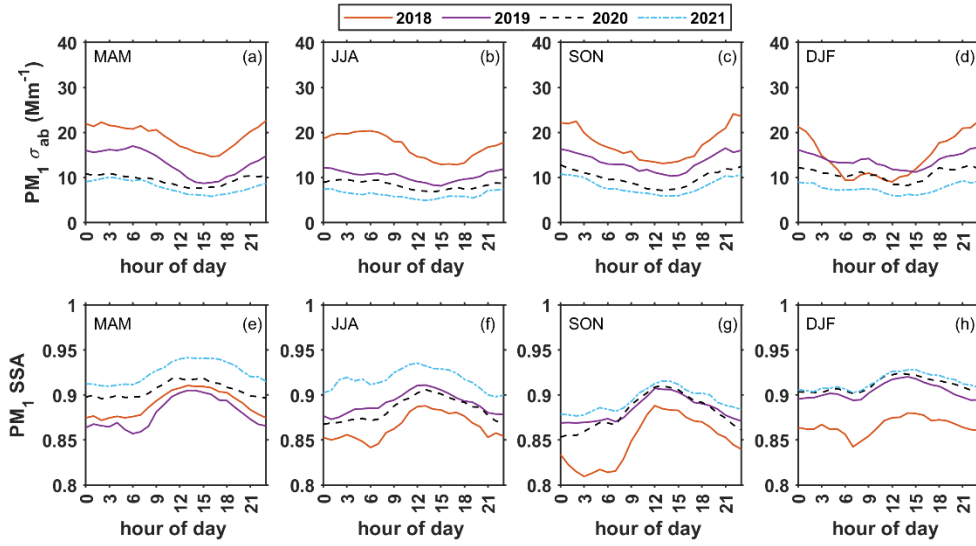

**Figure S2.** Diurnal variations of  $\sigma_{ab}$  (a-d) and SSA (e-h) at 550 nm for PM<sub>1</sub> from 2018 to 2021.

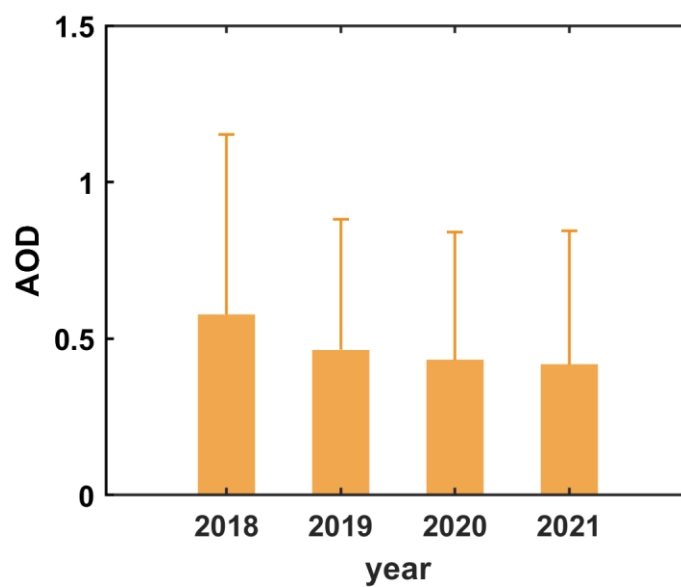

**Figure S3.** The annual variation of AOD from 2018 to 2021. Errorbar represents the standard deviation. (Available from the Aerosol Robotic Network)
